# Supplementary material
Source: Springer Nature journal article supplement (https://www.springermedizin.de/resource/supplementary/13256_2010_1814_MOESM2_ESM.pdf/9648520)

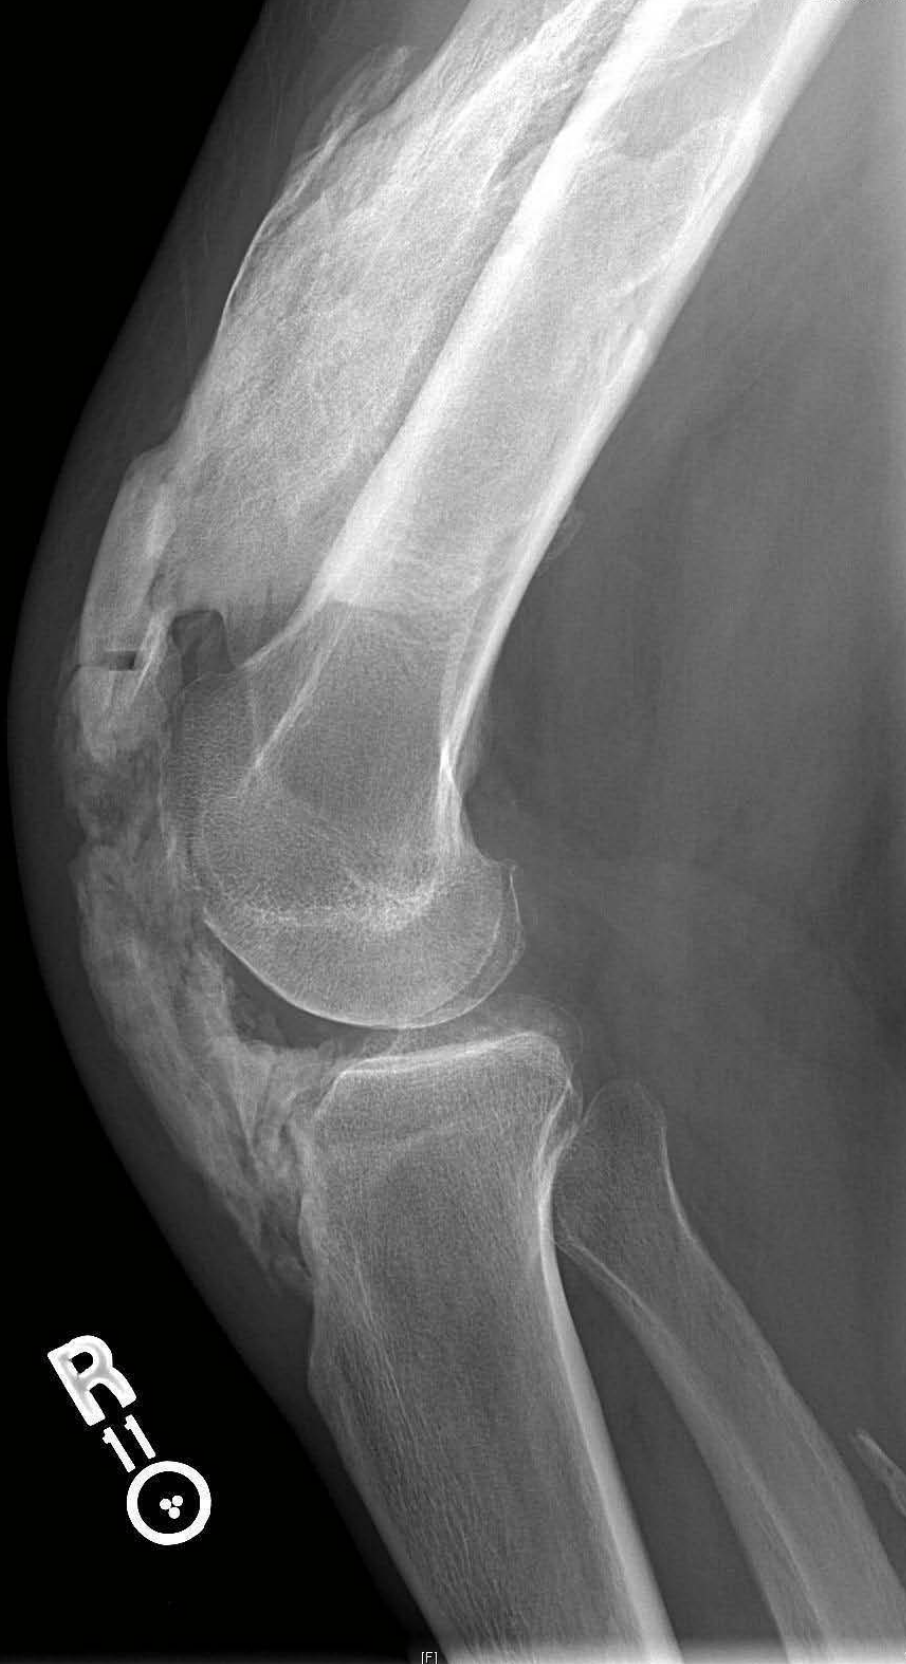

**B**  
1  
○

Supplement: MOESM2 [file 9648520]
